# Supplementary material
Source: Springer Nature journal article supplement (https://www.springermedizin.de/resource/supplementary/13005_2011_207_MOESM2_ESM.pdf/9626486)

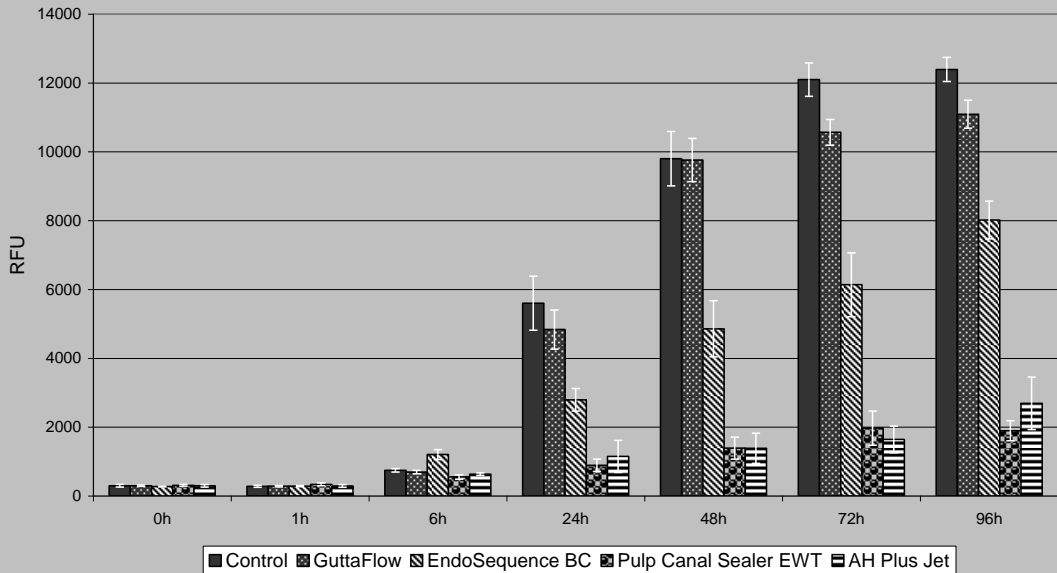

Supplement: MOESM2 [file 9626486]
